# Supplementary material
Source: PubMed Central journal article supplement (PMC8688309)

a.

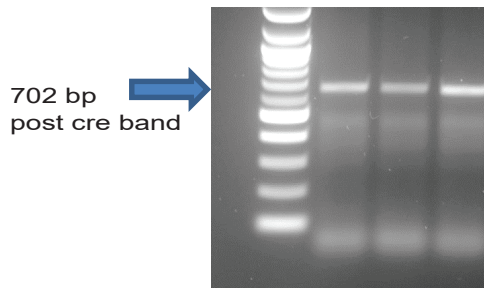

b.

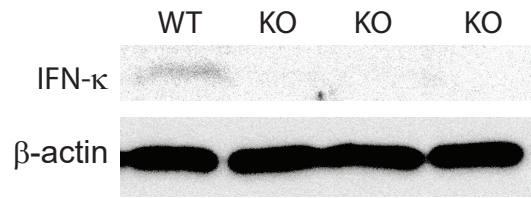

c.

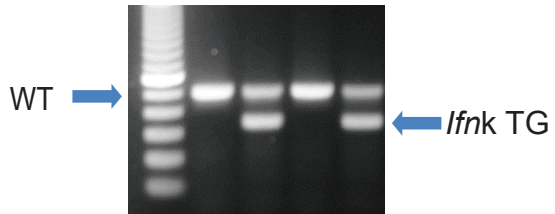

d.

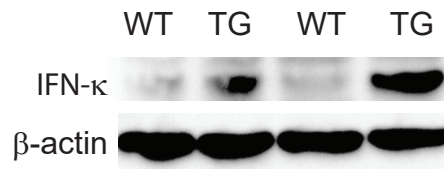

e.

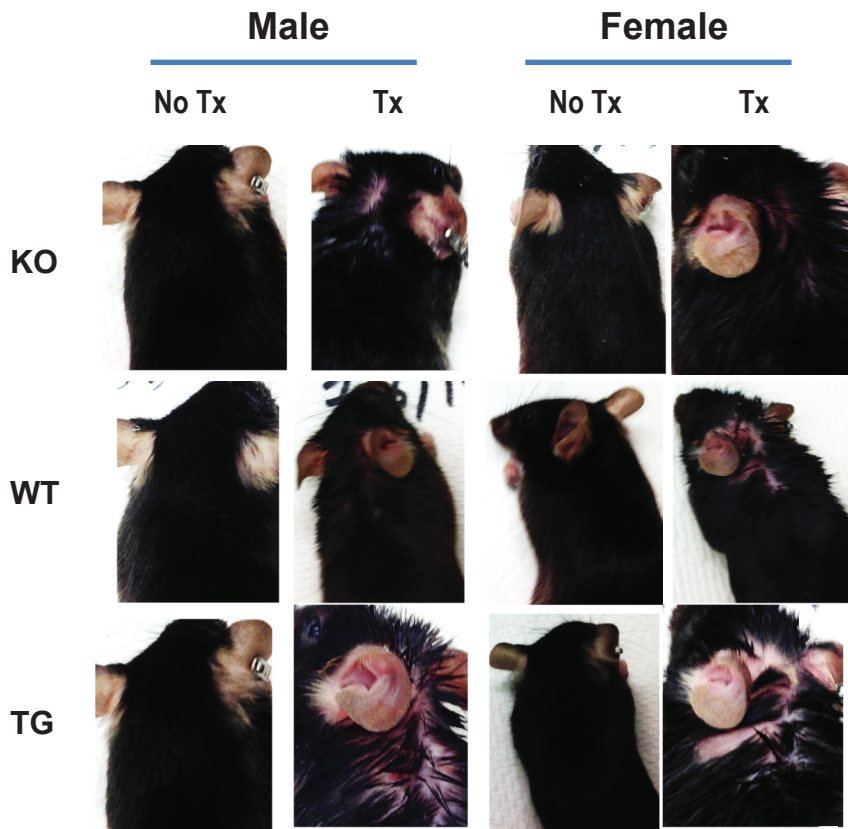

Supplement: NIHMS1731160-supplement-Supplementary_Figure_S1.pdf [file NIHMS1731160-supplement-Supplementary_Figure_S1.pdf]

**a. F4/80**

Vehicle

IMQ

KO

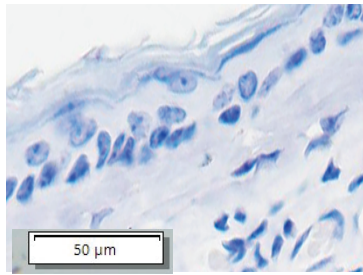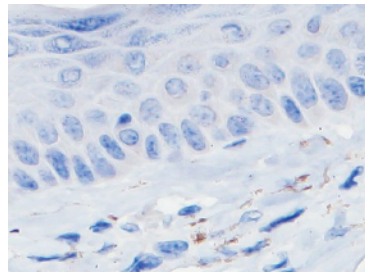

WT

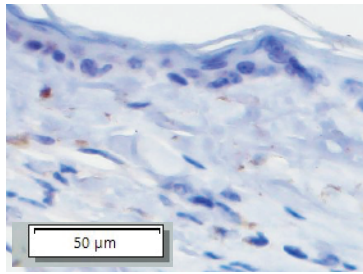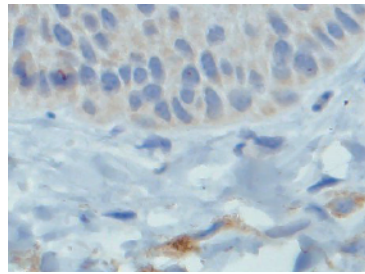

TG

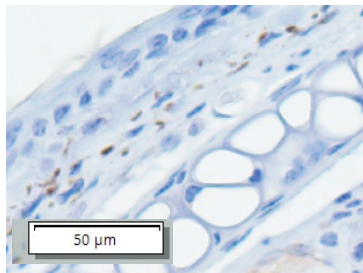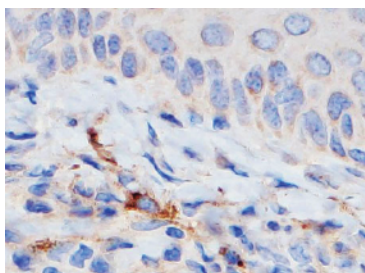

**b. CD11c**

Vehicle

IMQ

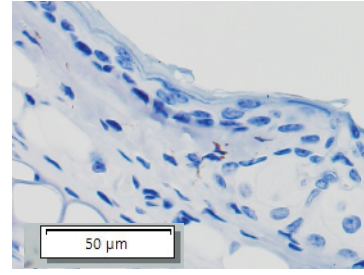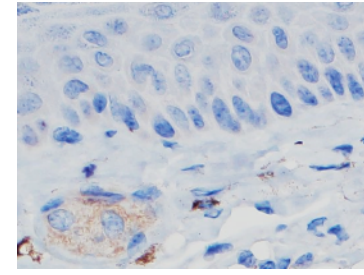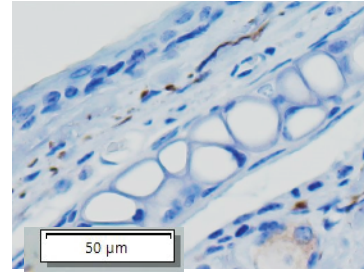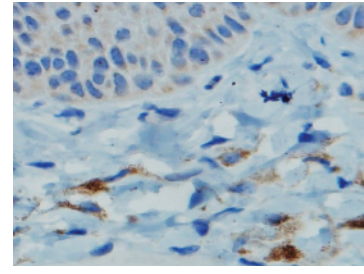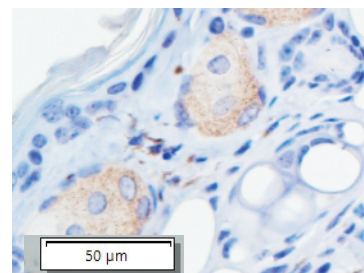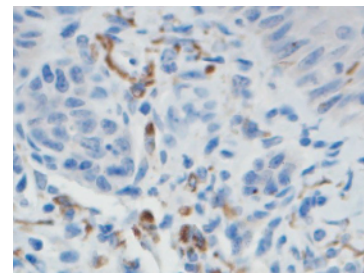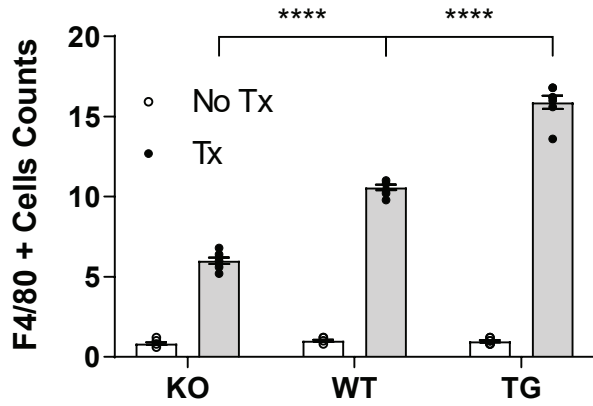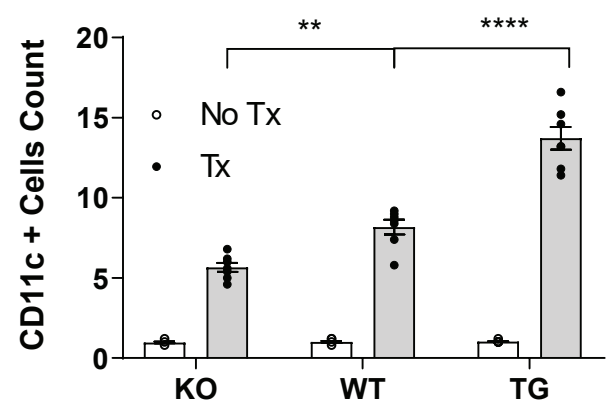

Supplement: NIHMS1731160-supplement-Supplementary_Figure_S2.pdf [file NIHMS1731160-supplement-Supplementary_Figure_S2.pdf]
